# Supplementary material for: P4HA2 Promotes Epithelial-to-Mesenchymal Transition and Glioma Malignancy through the Collagen-Dependent PI3K/AKT Pathway
Source: Hindawi journal article supplement (doi:10.1155/2021/1406853), 2021-08-16
Supplement: f1 [file 1406853.f1.zip]

Archive with 3 entries (3 files):
- 1406853.f1/Supplementary Fig.S1.docx
- 1406853.f1/Supplementary Fig.S2.docx
- 1406853.f1/Supplementary Fig.S3.docx
