# Supplementary material for: P4HA2 Promotes Epithelial-to-Mesenchymal Transition and Glioma Malignancy through the Collagen-Dependent PI3K/AKT Pathway
Source: Hindawi journal article supplement (doi:10.1155/2021/1406853), 2021-08-16
Supplement: f1 [file 1406853.f1.zip › 1406853.f1/Supplementary Fig.S1.docx]

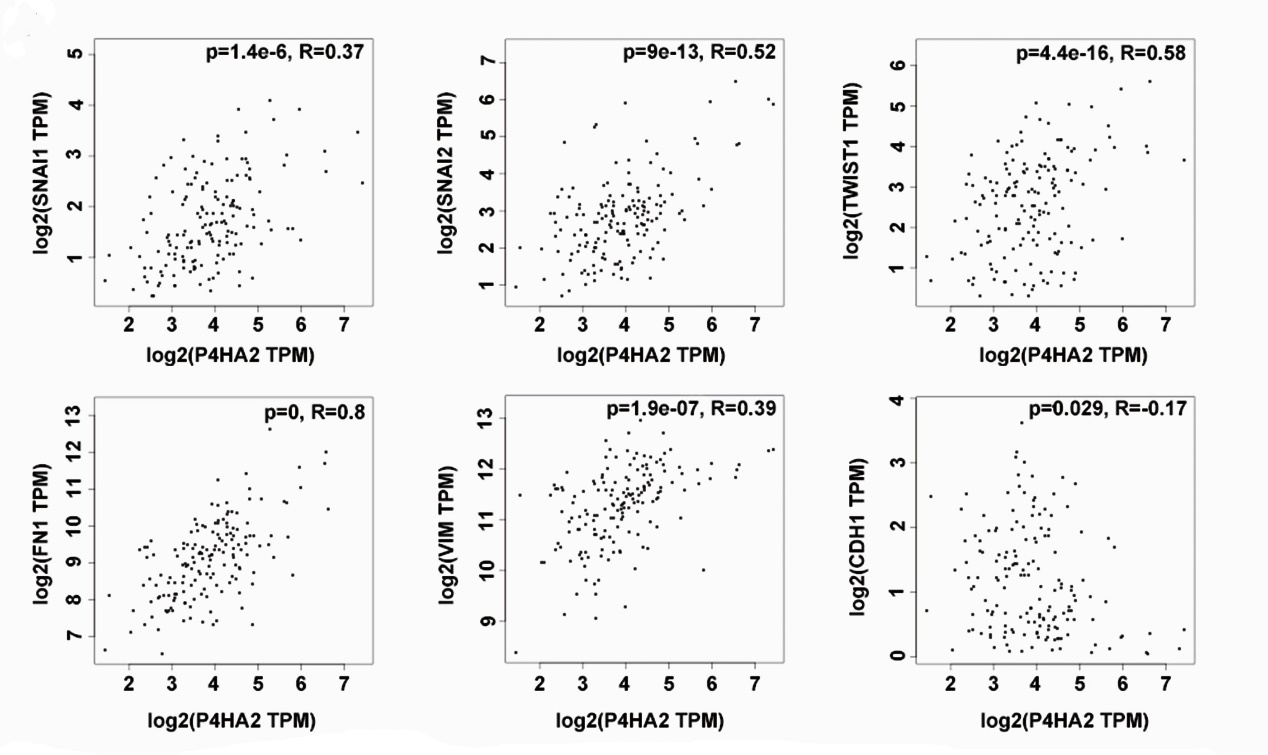


**Supplementary Fig.S1** **The mRNA correlations between P4HA2 and EMT genes.** TCGA transcriptional data were visualized with GEPIA webserver to demonstrate the significant correlations(P<0.05) between P4HA2 and the EMT-promoting genes SNAI1, SNAI2(SLUG), TWIST1, FN1, VIM, and CDH1(E-cadherin).
