# Supplementary material for: P4HA2 Promotes Epithelial-to-Mesenchymal Transition and Glioma Malignancy through the Collagen-Dependent PI3K/AKT Pathway
Source: Hindawi journal article supplement (doi:10.1155/2021/1406853), 2021-08-16
Supplement: f1 [file 1406853.f1.zip › 1406853.f1/Supplementary Fig.S2.docx]

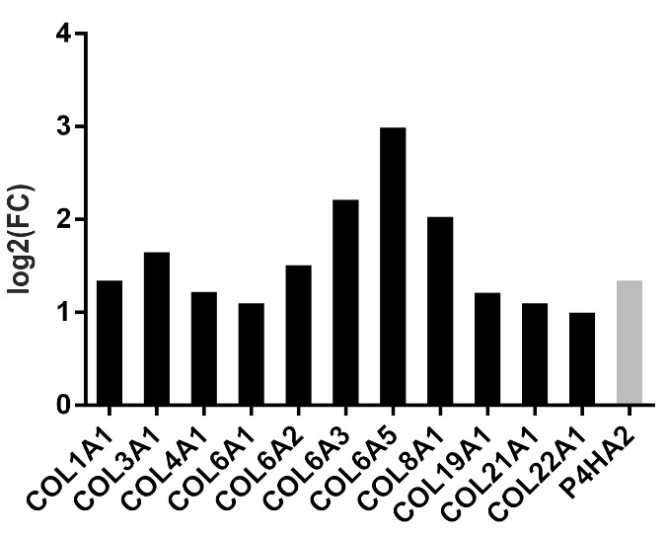


**Supplementary Fig.S2 Histogram of log-fold change of collagen genes between P4HA2 groups.** The transcriptional expressions of sample tissue collagens from TCGA data of glioma patients were shown to be increased with log-fold change being more than 1 in higher- compared to lower-P4HA2 level group.
