# Supplementary material for: P4HA2 Promotes Epithelial-to-Mesenchymal Transition and Glioma Malignancy through the Collagen-Dependent PI3K/AKT Pathway
Source: Hindawi journal article supplement (doi:10.1155/2021/1406853), 2021-08-16
Supplement: f1 [file 1406853.f1.zip › 1406853.f1/Supplementary Fig.S3.docx]

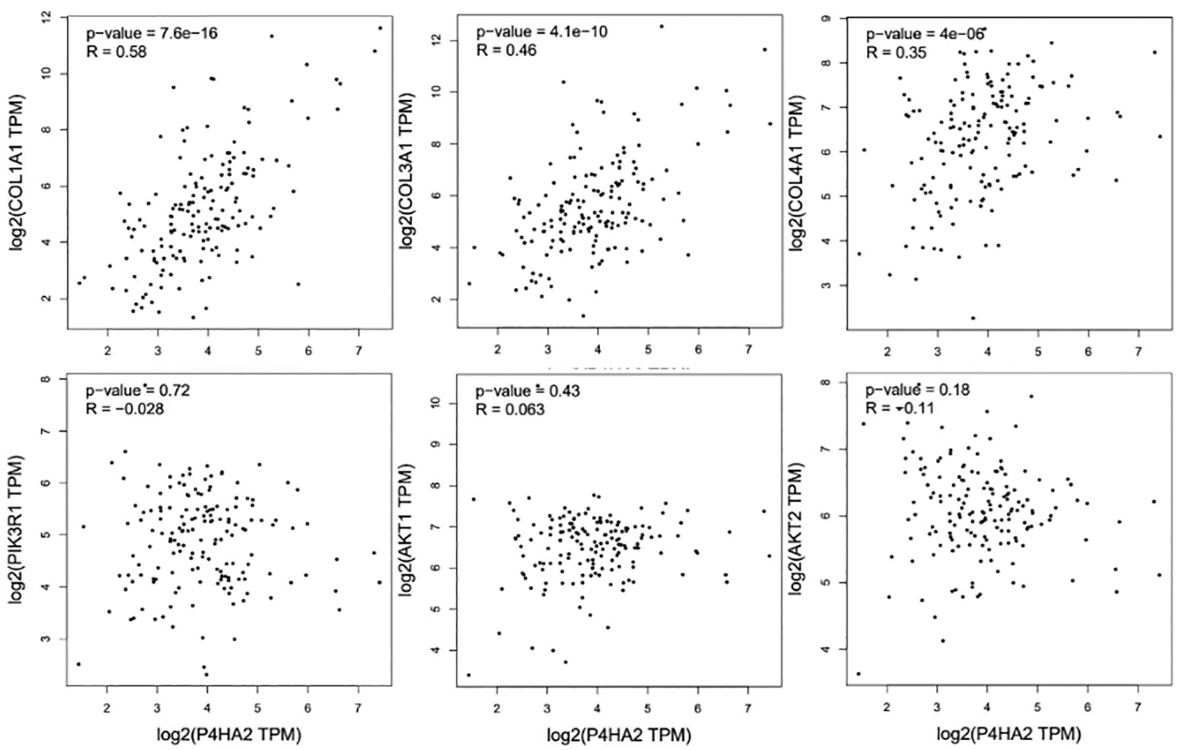


**Supplementary Fig.S3** The mRNA correlations between P4HA2 and genes related to the collagen-PI3K/AKT pathway. TCGA transcriptional data visualized with GEPIA webserver revealed significant correlations between P4HA2 and COL1A1, COL3A1, COL4A1 but nonsignificant correlations between P4HA2 and PI3K, AKT1, AKT2.
